# Supplementary material for: Comparative skin transcriptome analysis as a potential tool to investigate intra- and inter-population differences in belugas
Source: Frontiers journal article supplement (doi:10.3389/fmars.2024.1282210), 2024-11-29
Supplement: Table_3.XLSX [file Table_3.XLSX]

## Sheet: Sheet0
Supplementry Table 3. Differentiually expressed genes in BB-Spring vs ECS comparison
© 2000-2024 QIAGEN. All rights reserved.
Symbol	Entrez Gene Name	Entrez Gene/GenBank/Gene Symbol - human (HUGO / HGNC / Entrez Gene)/RefSeq/UniProt/Swiss-Prot Accession	Expr Log Ratio	Expr False Discovery Rate (q-value)	Location	Type(s)	Biomarker Application(s)	Drug(s)	Entrez Gene ID for Human
LRRC15	leucine rich repeat containing 15	LRRC15	4.928	3.21e-07	Plasma Membrane	other		samrotamab vedotin	131578
CPZ	carboxypeptidase Z	CPZ	4.707	2.58e-05	Extracellular Space	peptidase			8532
POSTN	periostin	POSTN	4.425	0.000202	Extracellular Space	other	unspecified application		10631
CCDC80	coiled-coil domain containing 80	CCDC80	4.297	0.000137	Nucleus	other			151887
COL21A1	collagen type XXI alpha 1 chain	COL21A1	4.172	6.68e-05	Extracellular Space	other		collagenase	81578
LSAMP	limbic system associated membrane protein	LSAMP	4.158	5.51e-05	Plasma Membrane	other			4045
PI16	peptidase inhibitor 16	PI16	4.137	0.000301	Extracellular Space	other			221476
BCAN	brevican	BCAN	4.037	1.02e-05	Extracellular Space	other			63827
APOE	apolipoprotein E	APOE	3.938	0.000432	Extracellular Space	transporter	diagnosis,efficacy,prognosis,unspecified application		348
LOX	lysyl oxidase	LOX	3.936	1.25e-06	Extracellular Space	enzyme		copper,PXS-5505	4015
CFH	complement factor H	CFH	3.808	0.000276	Extracellular Space	other	unspecified application	GT103	3075
MMP27	matrix metallopeptidase 27	MMP27	3.701	3.06e-05	Cytoplasm	peptidase		marimastat	64066
ESR1	estrogen receptor 1	ESR1	3.698	5.51e-05	Nucleus	ligand-dependent nuclear receptor	diagnosis,disease progression,efficacy,prognosis,response to therapy,unspecified application	17-alpha-ethinylestradiol,4-hydroxy-N-desmethyltamoxifen,4-hydroxytamoxifen,abemaciclib/fulvestrant,AC0682,acolbifene,alpelisib/fulvestrant,amcenestrant,anastrozole/exemestane/fulvestrant,anastrozole/exemestane/fulvestrant/tamoxifen,anastrozole/fulvestrant,anastrozole/fulvestrant/goserelin/tamoxifen,anastrozole/fulvestrant/tamoxifen,anastrozole/goserelin/tamoxifen,anastrozole/tamoxifen,ARV-471,ar…	2099
FGF18	fibroblast growth factor 18	FGF18	3.654	3.06e-05	Extracellular Space	growth factor			8817
COL3A1	collagen type III alpha 1 chain	COL3A1	3.641	0.000288	Extracellular Space	other	diagnosis,efficacy	collagenase	1281
MLPH	melanophilin	MLPH	3.566	4.97e-05	Cytoplasm	other			79083
COL1A1	collagen type I alpha 1 chain	COL1A1	3.537	0.000357	Extracellular Space	other	diagnosis	collagenase	1277
ENHO	energy homeostasis associated	ENHO	3.529	6.68e-05	Plasma Membrane	other			375704
OPTC	opticin	OPTC	3.527	4.74e-06	Extracellular Space	other			26254
TSPAN11	tetraspanin 11	TSPAN11	3.425	0.000301	Other	other			441631
PDGFRL	platelet derived growth factor receptor like	PDGFRL	3.418	0.000137	Plasma Membrane	kinase			5157
OGN	osteoglycin	OGN	3.39	0.000113	Extracellular Space	growth factor			4969
IGDCC4	immunoglobulin superfamily DCC subclass member 4	IGDCC4	3.335	1.53e-06	Plasma Membrane	other			57722
PRELP	proline and arginine rich end leucine rich repeat protein	PRELP	3.297	6.68e-05	Extracellular Space	other			5549
MMP23B	matrix metallopeptidase 23B	MMP23B	3.261	0.000554	Extracellular Space	peptidase			8510
GPR173	G protein-coupled receptor 173	GPR173	3.139	0.000728	Plasma Membrane	G-protein coupled receptor			54328
COL1A2	collagen type I alpha 2 chain	COL1A2	3.125	8.67e-05	Extracellular Space	other		collagenase	1278
COL8A1	collagen type VIII alpha 1 chain	COL8A1	3.096	0.000139	Extracellular Space	other		collagenase	1295
FAM180A	family with sequence similarity 180 member A	FAM180A	3.083	0.00465	Other	other			389558
PCOLCE2	procollagen C-endopeptidase enhancer 2	PCOLCE2	3.08	0.000591	Extracellular Space	other			26577
CD248	CD248 molecule	CD248	3.072	0.000719	Plasma Membrane	other		ontuxizumab	57124
MFAP5	microfibril associated protein 5	MFAP5	3.07	6.68e-05	Extracellular Space	other			8076
CYRIA	CYFIP related Rac1 interactor A	FAM49A	3.062	0.000719	Other	other			81553
ELN	elastin	ELN	3.037	0.000407	Extracellular Space	other	diagnosis		2006
SLC46A1	solute carrier family 46 member 1	SLC46A1	3.036	0.000282	Plasma Membrane	transporter			113235
ADGRD1	adhesion G protein-coupled receptor D1	ADGRD1	3.016	1.29e-05	Plasma Membrane	G-protein coupled receptor	safety		283383
RCOR2	REST corepressor 2	RCOR2	3.004	4.69e-05	Nucleus	transcription regulator			283248
DAGLA	diacylglycerol lipase alpha	DAGLA	2.977	0.00153	Plasma Membrane	enzyme			747
SUSD4	sushi domain containing 4	SUSD4	2.958	0.00154	Other	other			55061
GPX7	glutathione peroxidase 7	GPX7	2.955	0.000728	Cytoplasm	enzyme			2882
ACP5	acid phosphatase 5, tartrate resistant	ACP5	2.953	0.000788	Cytoplasm	phosphatase	disease progression,efficacy,unspecified application		54
DCN	decorin	DCN	2.945	1.29e-05	Extracellular Space	other			1634
FMOD	fibromodulin	FMOD	2.893	0.000286	Extracellular Space	other			2331
PLXDC1	plexin domain containing 1	PLXDC1	2.891	0.00125	Plasma Membrane	other			57125
PRUNE2	prune homolog 2 with BCH domain	PRUNE2	2.865	0.00019	Cytoplasm	other			158471
ARSK	arylsulfatase family member K	ARSK	2.851	1.25e-06	Extracellular Space	enzyme			153642
PDE3B	phosphodiesterase 3B	PDE3B	2.844	0.000407	Cytoplasm	enzyme		amrinone,cilostazol,dipyridamole,dyphylline,medorinone,pentoxifylline,theophylline,tolbutamide	5140
SLC7A10	solute carrier family 7 member 10	SLC7A10	2.831	0.0217	Plasma Membrane	transporter			56301
WSCD2	WSC domain containing 2	WSCD2	2.772	0.00805	Cytoplasm	enzyme			9671
PODN	podocan	PODN	2.752	0.00184	Cytoplasm	other			127435
PTGIS	prostaglandin I2 synthase	PTGIS	2.712	0.000637	Cytoplasm	enzyme		phenylbutazone	5740
ITGA11	integrin subunit alpha 11	ITGA11	2.71	5.51e-05	Plasma Membrane	other			22801
GPC3	glypican 3	GPC3	2.676	0.00156	Plasma Membrane	other	diagnosis,prognosis,unspecified application	anti-GPC3-IRDye800CW,CM350,codrituzumab,ERY974	2719
FN1	fibronectin 1	FN1	2.671	0.000823	Extracellular Space	other	diagnosis,efficacy,prognosis,unspecified application	AS1409,bifikafusp alfa,dodekin,iodine I 131 anti-fibronectin antibody fragment L19-SIP,L19-IL2 monoclonal antibody-cytokine fusion protein/L19TNFalpha,L19TNFalpha,ocriplasmin	2335
C1QTNF6	C1q and TNF related 6	C1QTNF6	2.648	0.0024	Extracellular Space	other			114904
COL5A1	collagen type V alpha 1 chain	COL5A1	2.637	0.00073	Extracellular Space	other		collagenase	1289
ZSCAN12	zinc finger and SCAN domain containing 12	ZSCAN12	2.628	0.0016	Nucleus	transcription regulator			9753
CD209	CD209 molecule	CD209	2.617	0.00241	Plasma Membrane	other			30835
FIBIN	fin bud initiation factor homolog	FIBIN	2.605	0.0109	Cytoplasm	other			387758
KERA	keratocan	KERA	2.563	0.000288	Extracellular Space	other			11081
ITGBL1	integrin subunit beta like 1	ITGBL1	2.532	0.00392	Extracellular Space	other			9358
C1QC	complement C1q C chain	C1QC	2.501	0.00418	Extracellular Space	other			714
ABI3BP	ABI family member 3 binding protein	ABI3BP	2.501	0.00695	Extracellular Space	other			25890
CREB3L1	cAMP responsive element binding protein 3 like 1	CREB3L1	2.5	0.000806	Nucleus	transcription regulator	unspecified application		90993
FKBP7	FKBP prolyl isomerase 7	FKBP7	2.5	6e-05	Cytoplasm	enzyme			51661
CNTFR	ciliary neurotrophic factor receptor	CNTFR	2.471	6.68e-05	Plasma Membrane	transmembrane receptor			1271
SMAD9	SMAD family member 9	SMAD9	2.461	0.000137	Nucleus	transcription regulator			4093
C5AR1	complement C5a receptor 1	C5AR1	2.439	0.00886	Plasma Membrane	G-protein coupled receptor		avacopan,IPH5401,TJ210001	728
FMO3	flavin containing dimethylaniline monoxygenase 3	FMO3	2.433	0.000591	Cytoplasm	enzyme			2328
LUM	lumican	LUM	2.425	0.00153	Extracellular Space	other			4060
F13A1	coagulation factor XIII A chain	F13A1	2.425	0.00911	Extracellular Space	enzyme			2162
CEP295NL	CEP295 N-terminal like	CEP295NL	2.414	0.00144	Extracellular Space	other			100653515
LRRC75A	leucine rich repeat containing 75A	LRRC75A	2.413	0.0064	Other	other			388341
CXCL9	C-X-C motif chemokine ligand 9	CXCL9	2.409	0.00557	Extracellular Space	cytokine	unspecified application		4283
SPON1	spondin 1	SPON1	2.409	0.000206	Extracellular Space	other			10418
C1QA	complement C1q A chain	C1QA	2.404	0.00557	Extracellular Space	other			712
C1QB	complement C1q B chain	C1QB	2.401	0.00269	Extracellular Space	other			713
ENPP2	ectonucleotide pyrophosphatase/phosphodiesterase 2	ENPP2	2.392	0.00228	Plasma Membrane	enzyme		VPC8a202	5168
FBLN1	fibulin 1	FBLN1	2.391	0.000276	Extracellular Space	other	unspecified application		2192
C1QTNF7	C1q and TNF related 7	C1QTNF7	2.383	0.00163	Extracellular Space	other			114905
ANGPTL1	angiopoietin like 1	ANGPTL1	2.367	0.000891	Plasma Membrane	other			9068
COL6A3	collagen type VI alpha 3 chain	COL6A3	2.348	0.000481	Extracellular Space	other		collagenase	1293
GALNT16	polypeptide N-acetylgalactosaminyltransferase 16	GALNT16	2.328	0.00563	Cytoplasm	enzyme			57452
CSF1	colony stimulating factor 1	CSF1	2.322	0.00045	Extracellular Space	cytokine	diagnosis,disease progression,efficacy,prognosis,unspecified application	lacnotuzumab,PD-360324	1435
SVOP	SV2 related protein	SVOP	2.322	0.00053	Cytoplasm	transporter			55530
COL14A1	collagen type XIV alpha 1 chain	COL14A1	2.318	0.00118	Extracellular Space	other		collagenase	7373
SLC43A1	solute carrier family 43 member 1	SLC43A1	2.31	0.00878	Plasma Membrane	transporter			8501
ECM2	extracellular matrix protein 2	ECM2	2.309	0.000301	Extracellular Space	other			1842
PTPRN	protein tyrosine phosphatase receptor type N	PTPRN	2.309	1.69e-05	Plasma Membrane	phosphatase			5798
OSR1	odd-skipped related transcription factor 1	OSR1	2.291	0.0334	Nucleus	transcription regulator			130497
DNM1	dynamin 1	DNM1	2.269	1.24e-05	Cytoplasm	enzyme			1759
SEMA6A	semaphorin 6A	SEMA6A	2.266	0.0106	Plasma Membrane	transmembrane receptor			57556
CXXC5	CXXC finger protein 5	CXXC5	2.259	1.06e-06	Nucleus	other			51523
GXYLT2	glucoside xylosyltransferase 2	GXYLT2	2.257	0.000202	Other	enzyme			727936
ADAMTS15	ADAM metallopeptidase with thrombospondin type 1 motif 15	ADAMTS15	2.245	0.0122	Extracellular Space	peptidase			170689
FBN1	fibrillin 1	FBN1	2.235	0.00216	Extracellular Space	other			2200
LRRN2	leucine rich repeat neuronal 2	LRRN2	2.232	0.0219	Plasma Membrane	other			10446
VCAN	versican	VCAN	2.231	0.00805	Extracellular Space	other			1462
CPXM1	carboxypeptidase X, M14 family member 1	CPXM1	2.217	6.68e-05	Extracellular Space	peptidase			56265
THBS2	thrombospondin 2	THBS2	2.215	0.00557	Extracellular Space	other			7058
PCK2	phosphoenolpyruvate carboxykinase 2, mitochondrial	PCK2	2.194	0.000555	Cytoplasm	kinase
MAPK8IP2	mitogen-activated protein kinase 8 interacting protein 2	MAPK8IP2	2.18	0.000276	Cytoplasm	other
PI3	peptidase inhibitor 3	PI3	2.18	0.00861	Extracellular Space	other
PTGER2	prostaglandin E receptor 2	PTGER2	2.17	0.00125	Plasma Membrane	G-protein coupled receptor		CP 533536,diclofenac/misoprostol,EP2 receptor agonist,misoprostol,omidenepag isopropyl,prostaglandin E1,prostaglandin E2,TPST-1495
CLEC11A	C-type lectin domain containing 11A	CLEC11A	2.163	0.00129	Extracellular Space	growth factor
CRTAC1	cartilage acidic protein 1	CRTAC1	2.153	0.0212	Extracellular Space	other
SLC38A5	solute carrier family 38 member 5	SLC38A5	2.148	0.000378	Plasma Membrane	transporter
VGLL3	vestigial like family member 3	VGLL3	2.142	0.00809	Other	other
COL12A1	collagen type XII alpha 1 chain	COL12A1	2.138	0.000511	Extracellular Space	other		collagenase
SDK1	sidekick cell adhesion molecule 1	SDK1	2.13	0.0348	Plasma Membrane	other
MAP1B	microtubule associated protein 1B	MAP1B	2.112	0.0018	Cytoplasm	other
NYAP1	neuronal tyrosine phosphorylated phosphoinositide-3-kinase adaptor 1	NYAP1	2.103	0.0115	Other	other
FNDC1	fibronectin type III domain containing 1	FNDC1	2.097	0.000891	Plasma Membrane	other		AGS-8M4
ADAMTS8	ADAM metallopeptidase with thrombospondin type 1 motif 8	ADAMTS8	2.093	0.014	Extracellular Space	peptidase
FGF7	fibroblast growth factor 7	FGF7	2.091	0.0353	Extracellular Space	growth factor
DUSP26	dual specificity phosphatase 26	DUSP26	2.084	0.00125	Cytoplasm	enzyme
ADAMTS2	ADAM metallopeptidase with thrombospondin type 1 motif 2	ADAMTS2	2.064	0.00313	Extracellular Space	peptidase	diagnosis,efficacy
MAN1C1	mannosidase alpha class 1C member 1	MAN1C1	2.062	0.000305	Cytoplasm	enzyme
COLEC12	collectin subfamily member 12	COLEC12	2.061	0.00146	Plasma Membrane	transmembrane receptor
FGL1	fibrinogen like 1	FGL1	2.058	0.000554	Extracellular Space	other	unspecified application
TENM3	teneurin transmembrane protein 3	TENM3	2.052	0.00427	Plasma Membrane	other
NTRK2	neurotrophic receptor tyrosine kinase 2	NTRK2	2.008	0.000844	Plasma Membrane	kinase	diagnosis,disease progression,response to therapy,unspecified application	AZ-23,belizatinib,bevacizumab/entrectinib,cabozantinib,cabozantinib/nivolumab,cabozantinib/tyrosine kinase inhibitor,entrectinib,larotrectinib,lorlatinib,LOXO-195,NOV1601,ONO-7579,PBI-200,PLX7486,repotrectinib,taletrectinib
DISP2	dispatched RND transporter family member 2	DISP2	2.001	0.00189	Plasma Membrane	other
WNT5A	Wnt family member 5A	WNT5A	1.985	0.00116	Extracellular Space	growth factor
TLR5	toll like receptor 5	TLR5	1.98	0.00216	Plasma Membrane	transmembrane receptor		entolimod
PCSK5	proprotein convertase subtilisin/kexin type 5	PCSK5	1.97	0.00242	Extracellular Space	peptidase	unspecified application
PCOLCE	procollagen C-endopeptidase enhancer	PCOLCE	1.969	0.00153	Extracellular Space	other
HOXA13	homeobox A13	HOXA13	1.969	0.012	Nucleus	transcription regulator
MAP1A	microtubule associated protein 1A	MAP1A	1.955	0.00158	Cytoplasm	other		estramustine
ANGPTL2	angiopoietin like 2	ANGPTL2	1.951	0.00162	Extracellular Space	other
PODNL1	podocan like 1	PODNL1	1.942	0.012	Extracellular Space	other
CTTNBP2	cortactin binding protein 2	CTTNBP2	1.941	0.00291	Cytoplasm	other
OLFML3	olfactomedin like 3	OLFML3	1.938	0.00245	Extracellular Space	other
BGN	biglycan	BGN	1.934	0.00794	Extracellular Space	other
ROR2	receptor tyrosine kinase like orphan receptor 2	ROR2	1.932	0.00203	Plasma Membrane	kinase		conditionally active biologic anti-ROR2 antibody drug conjugate
COL6A1	collagen type VI alpha 1 chain	COL6A1	1.926	0.00558	Extracellular Space	other		collagenase
LAMA2	laminin subunit alpha 2	LAMA2	1.922	0.0142	Extracellular Space	other
TMEM98	transmembrane protein 98	TMEM98	1.918	0.00202	Cytoplasm	other
CORO2B	coronin 2B	CORO2B	1.914	0.00372	Plasma Membrane	other
CDON	cell adhesion associated, oncogene regulated	CDON	1.907	0.00253	Plasma Membrane	other
SCARA5	scavenger receptor class A member 5	SCARA5	1.901	0.00448	Plasma Membrane	transmembrane receptor
GRAMD1B	GRAM domain containing 1B	GRAMD1B	1.897	0.0277	Cytoplasm	transporter
OLFML1	olfactomedin like 1	OLFML1	1.896	0.00278	Extracellular Space	other
TNXB	tenascin XB	TNXB	1.896	0.00484	Extracellular Space	other
NTN1	netrin 1	NTN1	1.885	0.00121	Extracellular Space	growth factor		NP137
TMEM200A	transmembrane protein 200A	TMEM200A	1.881	0.0428	Other	other
MMP19	matrix metallopeptidase 19	MMP19	1.869	0.00331	Extracellular Space	peptidase		marimastat
PCSK1N	proprotein convertase subtilisin/kexin type 1 inhibitor	PCSK1N	1.863	9.83e-05	Extracellular Space	other
TBX15	T-box transcription factor 15	TBX15	1.863	0.0122	Nucleus	transcription regulator
PIK3AP1	phosphoinositide-3-kinase adaptor protein 1	PIK3AP1	1.854	0.00228	Cytoplasm	other
FAIM2	Fas apoptotic inhibitory molecule 2	FAIM2	1.845	6.68e-05	Plasma Membrane	other
RCN3	reticulocalbin 3	RCN3	1.839	0.000347	Cytoplasm	other
PTH1R	parathyroid hormone 1 receptor	PTH1R	1.838	0.00867	Plasma Membrane	G-protein coupled receptor		abaloparatide,AZP-3601,PTH,raloxifene/teriparatide
AEBP1	AE binding protein 1	AEBP1	1.832	0.00146	Nucleus	peptidase	unspecified application
HSPA12A	heat shock protein family A (Hsp70) member 12A	HSPA12A	1.807	0.0118	Cytoplasm	other
NYNRIN	NYN domain and retroviral integrase containing	NYNRIN	1.803	0.00949	Other	other
DACT1	dishevelled binding antagonist of beta catenin 1	DACT1	1.794	0.029	Cytoplasm	other	unspecified application
MMP2	matrix metallopeptidase 2	MMP2	1.79	0.0141	Extracellular Space	peptidase	diagnosis,disease progression,efficacy,prognosis,response to therapy,unspecified application	131I-chlorotoxin,chlorotoxin,marimastat,MMP2 MMP9 inhibitor,prinomastat,rebimastat
NFATC4	nuclear factor of activated T cells 4	NFATC4	1.785	0.00102	Nucleus	transcription regulator
GPX8	glutathione peroxidase 8 (putative)	GPX8	1.783	0.000881	Cytoplasm	enzyme
FAM180B	family with sequence similarity 180 member B	FAM180B	1.781	0.0457	Other	other
COL5A2	collagen type V alpha 2 chain	COL5A2	1.779	0.000554	Extracellular Space	other		collagenase
SPARC	secreted protein acidic and cysteine rich	SPARC	1.774	0.0078	Extracellular Space	other	disease progression,efficacy
NID2	nidogen 2	NID2	1.771	0.015	Extracellular Space	other
TGFB3	transforming growth factor beta 3	TGFB3	1.769	0.0162	Extracellular Space	growth factor		AVID200,fresolimumab
MFAP2	microfibril associated protein 2	MFAP2	1.763	0.00452	Extracellular Space	other
FBLN2	fibulin 2	FBLN2	1.757	0.00324	Extracellular Space	other
IL21R	interleukin 21 receptor	IL21R	1.753	0.0299	Plasma Membrane	transmembrane receptor		denenicokin,latikafusp
SERPINH1	serpin family H member 1	SERPINH1	1.75	0.00341	Extracellular Space	other
LRFN1	leucine rich repeat and fibronectin type III domain containing 1	LRFN1	1.749	0.000357	Nucleus	other
ADGRA2	adhesion G protein-coupled receptor A2	ADGRA2	1.749	0.00484	Plasma Membrane	G-protein coupled receptor
VANGL2	VANGL planar cell polarity protein 2	VANGL2	1.745	0.00442	Plasma Membrane	other
WNT5B	Wnt family member 5B	WNT5B	1.743	7.96e-05	Extracellular Space	other
FAM114A1	family with sequence similarity 114 member A1	FAM114A1	1.742	0.00102	Extracellular Space	other
NOVA1	NOVA alternative splicing regulator 1	NOVA1	1.738	0.0108	Nucleus	other
PPARA	peroxisome proliferator activated receptor alpha	PPARA	1.737	0.0142	Nucleus	ligand-dependent nuclear receptor	diagnosis	aleglitazar,atorvastatin/choline fenofibrate,bezafibrate,choline fenofibrate,clofibrate,docosahexaenoic acid,ezetimibe/fenofibrate,fenofibrate,fenofibrate/pravastatin,fenofibrate/simvastatin,fenofibric acid/rosuvastatin,gemfibrozil,NS-220,pemafibrate,pirinixic acid,tesaglitazar,TPST-1120
FAP	fibroblast activation protein alpha	FAP	1.736	0.015	Cytoplasm	peptidase		177Lu-FAP-2286,64Cu FAP-2286,68Ga-FAPI,gallium Ga 68 FAP-2286,gallium Ga 68 FAPi-46,gallium Ga 68-DOTA-FAPI-04,RO6874281,RO6874813,RO7122290
THY1	Thy-1 cell surface antigen	THY1	1.735	0.00493	Plasma Membrane	other	diagnosis,disease progression
NLRP3	NLR family pyrin domain containing 3	NLRP3	1.734	0.0473	Cytoplasm	enzyme		BMS-986299,dapansutrile,emlenoflast
KIF1A	kinesin family member 1A	KIF1A	1.714	0.036	Cytoplasm	other	diagnosis,prognosis
SVEP1	sushi, von Willebrand factor type A, EGF and pentraxin domain containing 1	SVEP1	1.712	0.00387	Cytoplasm	other
DSEL	dermatan sulfate epimerase like	DSEL	1.71	0.00853	Extracellular Space	enzyme
CRISPLD2	cysteine rich secretory protein LCCL domain containing 2	CRISPLD2	1.709	0.0084	Cytoplasm	other
DISP1	dispatched RND transporter family member 1	DISP1	1.705	0.0119	Plasma Membrane	transporter
GAS2	growth arrest specific 2	GAS2	1.704	0.00183	Cytoplasm	other
CLEC3B	C-type lectin domain family 3 member B	CLEC3B	1.704	0.0199	Extracellular Space	other
PKDCC	protein kinase domain containing, cytoplasmic	PKDCC	1.691	0.0136	Cytoplasm	kinase
PTPRD	protein tyrosine phosphatase receptor type D	PTPRD	1.686	0.0266	Plasma Membrane	phosphatase
OLFML2B	olfactomedin like 2B	OLFML2B	1.669	0.0168	Extracellular Space	other
C1QTNF1	C1q and TNF related 1	C1QTNF1	1.665	0.0019	Extracellular Space	other
P4HA1	prolyl 4-hydroxylase subunit alpha 1	P4HA1	1.663	0.000834	Cytoplasm	enzyme	unspecified application
MXRA8	matrix remodeling associated 8	MXRA8	1.64	0.00814	Cytoplasm	other
MFAP4	microfibril associated protein 4	MFAP4	1.635	0.0168	Extracellular Space	other
PLPP7	phospholipid phosphatase 7 (inactive)	PLPP7	1.628	0.0277	Nucleus	phosphatase
SSPN	sarcospan	SSPN	1.623	0.0103	Plasma Membrane	other
OSR2	odd-skipped related transciption factor 2	OSR2	1.622	0.0302	Nucleus	transcription regulator
BMP4	bone morphogenetic protein 4	BMP4	1.613	0.0199	Extracellular Space	growth factor
COL6A2	collagen type VI alpha 2 chain	COL6A2	1.611	0.0127	Extracellular Space	other		collagenase
KIAA0408	KIAA0408	KIAA0408	1.601	0.0414	Other	other
GLI2	GLI family zinc finger 2	GLI2	1.598	0.0389	Nucleus	transcription regulator	efficacy
FBLN5	fibulin 5	FBLN5	1.592	0.00317	Extracellular Space	other
PRICKLE1	prickle planar cell polarity protein 1	PRICKLE1	1.591	0.0105	Nucleus	other
CLIP2	CAP-Gly domain containing linker protein 2	CLIP2	1.59	0.00277	Cytoplasm	transcription regulator
GLIS2	GLIS family zinc finger 2	GLIS2	1.587	0.0208	Nucleus	transcription regulator
SYK	spleen associated tyrosine kinase	SYK	1.583	0.0365	Cytoplasm	kinase	efficacy,response to therapy	BAY 61-3606,cerdulatinib,cevidoplenib,entospletinib,fostamatinib,GSK2646264,lanraplenib,mivavotinib,MTX-216,OXSI-2,R-348,sovleplenib,staurosporine,tamatinib
CACNA1G	calcium voltage-gated channel subunit alpha1 G	CACNA1G	1.582	0.00568	Plasma Membrane	ion channel	diagnosis	cinnarizine,ethosuximide,flunarizine,mibefradil,trimethadione,zonisamide
SLC7A2	solute carrier family 7 member 2	SLC7A2	1.581	0.0192	Plasma Membrane	transporter
PRRX2	paired related homeobox 2	PRRX2	1.57	0.0389	Nucleus	transcription regulator
ADGRE5	adhesion G protein-coupled receptor E5	ADGRE5	1.565	0.00211	Plasma Membrane	G-protein coupled receptor
HMCN1	hemicentin 1	HMCN1	1.561	0.0136	Extracellular Space	other
S1PR3	sphingosine-1-phosphate receptor 3	S1PR3	1.558	0.0434	Plasma Membrane	G-protein coupled receptor		fingolimod phosphate
ARMCX3	armadillo repeat containing X-linked 3	ARMCX3	1.556	0.00984	Cytoplasm	other
LTBP2	latent transforming growth factor beta binding protein 2	LTBP2	1.553	0.00459	Extracellular Space	other
RCN1	reticulocalbin 1	RCN1	1.547	0.000375	Cytoplasm	other
SRGAP1	SLIT-ROBO Rho GTPase activating protein 1	SRGAP1	1.547	0.0155	Cytoplasm	other
TRAM2	translocation associated membrane protein 2	TRAM2	1.54	0.00332	Other	other
NPR2	natriuretic peptide receptor 2	NPR2	1.539	0.00263	Plasma Membrane	G-protein coupled receptor		nesiritide,vosoritide
SPON2	spondin 2	SPON2	1.532	0.00756	Extracellular Space	other	diagnosis
ADGRL1	adhesion G protein-coupled receptor L1	ADGRL1	1.522	0.000465	Plasma Membrane	G-protein coupled receptor
TIMP2	TIMP metallopeptidase inhibitor 2	TIMP2	1.52	0.0266	Extracellular Space	other	efficacy,unspecified application
EMILIN3	elastin microfibril interfacer 3	EMILIN3	1.511	0.00114	Extracellular Space	other
ANKRD6	ankyrin repeat domain 6	ANKRD6	1.51	0.0291	Nucleus	transcription regulator
ISLR	immunoglobulin superfamily containing leucine rich repeat	ISLR	1.505	0.0403	Extracellular Space	other
MGAM	maltase-glucoamylase	MGAM	1.502	0.0351	Plasma Membrane	enzyme		acarbose,acarbose/orlistat,celgosivir,miglitol,voglibose
PMP22	peripheral myelin protein 22	PMP22	1.499	0.0251	Plasma Membrane	other
AXL	AXL receptor tyrosine kinase	AXL	1.499	0.00625	Plasma Membrane	kinase		BA3011,bemcentinib,bosutinib,bosutinib/imatinib,bosutinib/rituximab,BPI-9016M,cabozantinib,cabozantinib/nivolumab,cabozantinib/tyrosine kinase inhibitor,CH5451098,DP-3975,DS-1205c,dubermatinib,gilteritinib,HH30134,humax-AXL-ADC,INCB081776,KC1036,mipasetamab uzoptirine,ningetinib,ONO-7475,PF-07265807,Q702,RXDX-106,sitravatinib,SKI-G-801,SLC-391,tilvestamab
KIAA1755	KIAA1755	KIAA1755	1.499	0.0409	Other	other
PDZRN3	PDZ domain containing ring finger 3	PDZRN3	1.489	0.0252	Extracellular Space	enzyme
ENTREP3	endosomal transmembrane epsin interactor 3	FAM189B	1.486	0.00157	Other	other
SEMA3B	semaphorin 3B	SEMA3B	1.486	0.00931	Extracellular Space	other
RNASET2	ribonuclease T2	RNASET2	1.484	0.00582	Cytoplasm	enzyme
SDC2	syndecan 2	SDC2	1.482	0.00968	Plasma Membrane	other
PPIC	peptidylprolyl isomerase C	PPIC	1.481	0.00253	Cytoplasm	enzyme
HIC1	HIC ZBTB transcriptional repressor 1	HIC1	1.477	0.0029	Nucleus	transcription regulator	diagnosis
RSPO1	R-spondin 1	RSPO1	1.473	0.0454	Plasma Membrane	other
MICOS10-NBL1/NBL1	NBL1, DAN family BMP antagonist	NBL1	1.468	0.00679	Nucleus	other
BEX4	brain expressed X-linked 4	BEX4	1.468	0.0103	Cytoplasm	other
GGT7	gamma-glutamyltransferase 7	GGT7	1.465	0.0203	Plasma Membrane	enzyme
DTX3	deltex E3 ubiquitin ligase 3	DTX3	1.462	0.0278	Cytoplasm	other
GREM1	gremlin 1, DAN family BMP antagonist	GREM1	1.456	0.0468	Extracellular Space	other	unspecified application	UCB6114
OBSL1	obscurin like cytoskeletal adaptor 1	OBSL1	1.453	0.000378	Cytoplasm	other
PAIP2B	poly(A) binding protein interacting protein 2B	PAIP2B	1.45	0.00456	Other	translation regulator
PIK3R1	phosphoinositide-3-kinase regulatory subunit 1	PIK3R1	1.448	1.25e-06	Cytoplasm	kinase
EN1	engrailed homeobox 1	EN1	1.447	0.0477	Nucleus	transcription regulator
DMRTA2	DMRT like family A2	DMRTA2	1.446	0.0266	Nucleus	transcription regulator
C2	complement C2	C2	1.444	0.0118	Extracellular Space	peptidase
PLPP3	phospholipid phosphatase 3	PLPP3	1.442	0.00288	Plasma Membrane	phosphatase
LGALS3BP	galectin 3 binding protein	LGALS3BP	1.442	0.0108	Plasma Membrane	transmembrane receptor	prognosis
FAM149A	family with sequence similarity 149 member A	FAM149A	1.441	0.00339	Other	other
SGCB	sarcoglycan beta	SGCB	1.439	0.00208	Plasma Membrane	other
LOXL2	lysyl oxidase like 2	LOXL2	1.438	0.0331	Extracellular Space	enzyme		PAT-1251,simtuzumab
KANK2	KN motif and ankyrin repeat domains 2	KANK2	1.436	0.00751	Nucleus	transcription regulator
SEZ6L2	seizure related 6 homolog like 2	SEZ6L2	1.435	0.0242	Cytoplasm	other
ARMCX2	armadillo repeat containing X-linked 2	ARMCX2	1.43	0.0162	Other	other
BICC1	BicC family RNA binding protein 1	BICC1	1.425	0.0261	Other	other
ALDH1L2	aldehyde dehydrogenase 1 family member L2	ALDH1L2	1.42	0.00158	Cytoplasm	enzyme
DTX4	deltex E3 ubiquitin ligase 4	DTX4	1.418	0.038	Cytoplasm	enzyme
ZNF671	zinc finger protein 671	ZNF671	1.418	0.0241	Nucleus	transcription regulator	unspecified application
ARHGEF40	Rho guanine nucleotide exchange factor 40	ARHGEF40	1.417	0.015	Cytoplasm	other
SELENOM	selenoprotein M	SELENOM	1.415	0.0116	Cytoplasm	other
KNDC1	kinase non-catalytic C-lobe domain containing 1	KNDC1	1.415	0.038	Plasma Membrane	other
P4HA3	prolyl 4-hydroxylase subunit alpha 3	P4HA3	1.412	0.0193	Cytoplasm	enzyme
MEOX1	mesenchyme homeobox 1	MEOX1	1.411	0.0456	Nucleus	transcription regulator
NUCB2	nucleobindin 2	NUCB2	1.404	0.0341	Nucleus	other
CDR2L	cerebellar degeneration related protein 2 like	CDR2L	1.398	4.16e-06	Other	other
HEPH	hephaestin	HEPH	1.394	0.0494	Plasma Membrane	transporter
PLTP	phospholipid transfer protein	PLTP	1.389	0.000785	Extracellular Space	enzyme
LVRN	laeverin	LVRN	1.389	0.0387	Other	peptidase
PLEKHH2	pleckstrin homology, MyTH4 and FERM domain containing H2	PLEKHH2	1.386	0.00567	Cytoplasm	other
GFPT2	glutamine-fructose-6-phosphate transaminase 2	GFPT2	1.385	0.0495	Cytoplasm	enzyme
WNT11	Wnt family member 11	WNT11	1.384	0.0108	Extracellular Space	other
CD34	CD34 molecule	CD34	1.377	0.00893	Plasma Membrane	other	efficacy,prognosis,unspecified application
SERPING1	serpin family G member 1	SERPING1	1.37	0.0149	Extracellular Space	other
CNTNAP1	contactin associated protein 1	CNTNAP1	1.368	0.0088	Plasma Membrane	other
BACE1	beta-secretase 1	BACE1	1.363	1.25e-06	Cytoplasm	peptidase		atabecestat,elenbecestat,lanabecestat,verubecestat
LOXL1	lysyl oxidase like 1	LOXL1	1.354	0.0325	Extracellular Space	enzyme	unspecified application
CHD5	chromodomain helicase DNA binding protein 5	CHD5	1.352	0.0281	Nucleus	enzyme
SLIT3	slit guidance ligand 3	SLIT3	1.346	0.0144	Extracellular Space	other
LARP6	La ribonucleoprotein 6, translational regulator	LARP6	1.343	0.0207	Cytoplasm	other
FBLN7	fibulin 7	FBLN7	1.342	0.00423	Extracellular Space	other
SGCE	sarcoglycan epsilon	SGCE	1.339	0.0139	Plasma Membrane	other
IL10RA	interleukin 10 receptor subunit alpha	IL10RA	1.334	0.0466	Plasma Membrane	transmembrane receptor
ENPEP	glutamyl aminopeptidase	ENPEP	1.332	0.011	Plasma Membrane	peptidase
CPAMD8	C3 and PZP like alpha-2-macroglobulin domain containing 8	CPAMD8	1.326	0.0155	Extracellular Space	other
PHLDB1	pleckstrin homology like domain family B member 1	PHLDB1	1.323	0.0171	Cytoplasm	other
PRKAB2	protein kinase AMP-activated non-catalytic subunit beta 2	PRKAB2	1.312	5.16e-05	Cytoplasm	kinase
COL16A1	collagen type XVI alpha 1 chain	COL16A1	1.307	0.00418	Extracellular Space	other		collagenase
PPP1R3D	protein phosphatase 1 regulatory subunit 3D	PPP1R3D	1.303	0.0116	Cytoplasm	phosphatase
DAB2	DAB adaptor protein 2	DAB2	1.303	0.00379	Plasma Membrane	other
RFTN2	raftlin family member 2	RFTN2	1.29	0.0221	Other	other
HOXA10	homeobox A10	HOXA10	1.29	0.019	Nucleus	transcription regulator
GHR	growth hormone receptor	GHR	1.286	0.0192	Plasma Membrane	transmembrane receptor		cimderlirsen,GH1,lonapegsomatropin,pegvisomant,prednisone/somatotropin,somapacitan,somatrem,somatrogon
LGALS1	galectin 1	LGALS1	1.286	0.0051	Extracellular Space	other	diagnosis,prognosis	OTX008
SH3RF3	SH3 domain containing ring finger 3	SH3RF3	1.282	0.0166	Other	enzyme
RARRES1	retinoic acid receptor responder 1	RARRES1	1.279	0.0173	Plasma Membrane	other	diagnosis
SOGA1	suppressor of glucose, autophagy associated 1	SOGA1	1.275	0.000898	Extracellular Space	other
PTPN6	protein tyrosine phosphatase non-receptor type 6	PTPN6	1.271	0.0106	Cytoplasm	phosphatase		SC-43
FXYD1	FXYD domain containing ion transport regulator 1	FXYD1	1.268	0.000762	Plasma Membrane	ion channel
IGF1	insulin like growth factor 1	IGF1	1.266	0.0488	Extracellular Space	growth factor	diagnosis,efficacy,prognosis,safety	BI 836845,MEDI-573
DAAM2	dishevelled associated activator of morphogenesis 2	DAAM2	1.266	0.0149	Cytoplasm	other	unspecified application
DCLK1	doublecortin like kinase 1	DCLK1	1.262	0.0336	Plasma Membrane	kinase
FSTL1	follistatin like 1	FSTL1	1.261	0.0427	Extracellular Space	other
RAMP3	receptor activity modifying protein 3	RAMP3	1.252	0.0351	Plasma Membrane	G-protein coupled receptor		pramlintide
CERCAM	cerebral endothelial cell adhesion molecule	CERCAM	1.25	0.00561	Other	other
CXCL12	C-X-C motif chemokine ligand 12	CXCL12	1.248	0.0289	Extracellular Space	cytokine	diagnosis,efficacy,prognosis,unspecified application	necuparanib,NOX-A12
LRP3	LDL receptor related protein 3	LRP3	1.239	0.00797	Plasma Membrane	transmembrane receptor
GPR153	G protein-coupled receptor 153	GPR153	1.238	0.0279	Plasma Membrane	G-protein coupled receptor
GNB4	G protein subunit beta 4	GNB4	1.236	0.0192	Plasma Membrane	other
RAB15	RAB15, member RAS oncogene family	RAB15	1.234	0.000637	Cytoplasm	other
PLEKHB1	pleckstrin homology domain containing B1	PLEKHB1	1.23	0.0201	Cytoplasm	other
ADAM12	ADAM metallopeptidase domain 12	ADAM12	1.228	0.0434	Plasma Membrane	peptidase	diagnosis
AK1	adenylate kinase 1	AK1	1.219	0.029	Cytoplasm	kinase	unspecified application
NHSL2	NHS like 2	NHSL2	1.219	0.0264	Other	other
ZNF184	zinc finger protein 184	ZNF184	1.219	0.00582	Nucleus	transcription regulator
RUNX1T1	RUNX1 partner transcriptional co-repressor 1	RUNX1T1	1.218	0.0394	Nucleus	transcription regulator
PLEKHO2	pleckstrin homology domain containing O2	PLEKHO2	1.217	0.0238	Cytoplasm	other
FKBP14	FKBP prolyl isomerase 14	FKBP14	1.216	0.0109	Cytoplasm	enzyme
ZEB2	zinc finger E-box binding homeobox 2	ZEB2	1.216	0.0138	Nucleus	transcription regulator
MAPK8IP3	mitogen-activated protein kinase 8 interacting protein 3	MAPK8IP3	1.21	0.00189	Cytoplasm	other
KLHL40	kelch like family member 40	KLHL40	1.21	0.0122	Cytoplasm	other
GCA	grancalcin	GCA	1.209	0.0287	Cytoplasm	other
PDE4A	phosphodiesterase 4A	PDE4A	1.208	0.0223	Cytoplasm	enzyme		amrinone,anagrelide,apremilast,arofylline,aspirin/dipyridamole,aspirin/dipyridamole/telmisartan,caffeine,caffeine/ergotamine,cilomilast,crisaborole,dipyridamole,drotaverin,dyphylline,enprofylline,ibudilast,ketotifen,L 869298,L-826,141,milrinone,pentoxifylline,roflumilast,sildenafil,tetomilast,theophylline
GLT8D1	glycosyltransferase 8 domain containing 1	GLT8D1	1.206	0.0106	Cytoplasm	enzyme
TPCN1	two pore segment channel 1	TPCN1	1.205	0.000374	Plasma Membrane	ion channel
RNFT2	ring finger protein, transmembrane 2	RNFT2	1.203	0.00995	Other	other
CHST2	carbohydrate sulfotransferase 2	CHST2	1.187	0.0457	Cytoplasm	enzyme
SSBP4	single stranded DNA binding protein 4	SSBP4	1.184	0.0236	Nucleus	transcription regulator
NEURL1B	neuralized E3 ubiquitin protein ligase 1B	NEURL1B	1.176	0.00165	Cytoplasm	enzyme
TLR7	toll like receptor 7	TLR7	1.171	0.0422	Plasma Membrane	transmembrane receptor		5-fluorouracil/imiquimod,APR003,BDB018,BDC-1001,BNT411,DSP-0509,enpatoran,hydroxychloroquine,imiquimod,LHC165,NKTR-262,PF-4878691,resiquimod,RO7119929,SHR2150,TQ-A3334,UC-1V150,vesatolimod
CPT1C	carnitine palmitoyltransferase 1C	CPT1C	1.168	0.00623	Cytoplasm	enzyme
ZNF503	zinc finger protein 503	ZNF503	1.163	0.00783	Nucleus	other
PIK3IP1	phosphoinositide-3-kinase interacting protein 1	PIK3IP1	1.163	0.00872	Cytoplasm	other
ATP8B2	ATPase phospholipid transporting 8B2	ATP8B2	1.155	0.031	Plasma Membrane	transporter
CDIP1	cell death inducing p53 target 1	CDIP1	1.153	0.0011	Nucleus	other
SYNPO	synaptopodin	SYNPO	1.134	0.0199	Cytoplasm	other
NKD1	NKD inhibitor of WNT signaling pathway 1	NKD1	1.132	0.0297	Other	other
ZNF496	zinc finger protein 496	ZNF496	1.131	0.000487	Nucleus	transcription regulator
MIA	MIA SH3 domain containing	MIA	1.131	0.0458	Extracellular Space	other	disease progression,prognosis
TICAM1	TIR domain containing adaptor molecule 1	TICAM1	1.125	0.0125	Nucleus	other
KCNMA1	potassium calcium-activated channel subfamily M alpha 1	KCNMA1	1.124	0.0388	Plasma Membrane	ion channel	diagnosis	cromolyn,tedisamil
FKBP10	FKBP prolyl isomerase 10	FKBP10	1.122	0.00652	Cytoplasm	enzyme
TNC	tenascin C	TNC	1.117	0.0173	Extracellular Space	other	diagnosis,response to therapy,unspecified application	131I-tenatumomab,F16-IL2 fusion protein,iodine I 131 monoclonal antibody F16SIP
MAP2K6	mitogen-activated protein kinase kinase 6	MAP2K6	1.115	0.0144	Cytoplasm	kinase	prognosis
PTN	pleiotrophin	PTN	1.111	0.0388	Extracellular Space	growth factor
CXCL14	C-X-C motif chemokine ligand 14	CXCL14	1.111	0.0103	Extracellular Space	cytokine	unspecified application
IGF2	insulin like growth factor 2	IGF2	1.109	0.0271	Extracellular Space	growth factor	diagnosis,efficacy,prognosis	BI 836845,MEDI-573
NAP1L5	nucleosome assembly protein 1 like 5	NAP1L5	1.108	0.00931	Other	other
ZNF835	zinc finger protein 835	ZNF835	1.107	0.0279	Other	other
SAMD4A	sterile alpha motif domain containing 4A	SAMD4A	1.103	0.0165	Cytoplasm	translation regulator
RIMS3	regulating synaptic membrane exocytosis 3	RIMS3	1.096	0.00324	Plasma Membrane	other
FBN3	fibrillin 3	FBN3	1.096	0.0373	Extracellular Space	other
KIAA1614	KIAA1614	KIAA1614	1.095	0.0357	Other	other
RBMS2	RNA binding motif single stranded interacting protein 2	RBMS2	1.093	0.000487	Nucleus	other
P3H4	prolyl 3-hydroxylase family member 4 (inactive)	P3H4	1.093	0.0011	Nucleus	other
CTSK	cathepsin K	CTSK	1.092	0.0119	Cytoplasm	peptidase	efficacy	balicatib,cathepsin K inhibitor,odanacatib
MACF1	microtubule actin crosslinking factor 1	KIAA0754	1.081	0.0109	Cytoplasm	other
RGS10	regulator of G protein signaling 10	RGS10	1.074	0.015	Cytoplasm	enzyme
BAIAP2L2	BAR/IMD domain containing adaptor protein 2 like 2	BAIAP2L2	1.07	0.0102	Cytoplasm	other
FRK	fyn related Src family tyrosine kinase	FRK	1.066	0.0437	Nucleus	kinase		regorafenib,regorafenib/sunitinib
ARHGEF25	Rho guanine nucleotide exchange factor 25	ARHGEF25	1.065	0.0278	Cytoplasm	other
TRIM32	tripartite motif containing 32	TRIM32	1.064	0.0105	Nucleus	transcription regulator
SLC1A4	solute carrier family 1 member 4	SLC1A4	1.063	0.00592	Plasma Membrane	transporter		riluzole
CLDN7	claudin 7	CLDN7	1.063	0.0358	Plasma Membrane	other	unspecified application
ANO5	anoctamin 5	ANO5	1.062	0.0461	Plasma Membrane	ion channel
EPHA4	EPH receptor A4	EPHA4	1.059	0.0361	Plasma Membrane	kinase
SMARCD3	SWI/SNF related, matrix associated, actin dependent regulator of chromatin, subfamily d, member 3	SMARCD3	1.052	0.0117	Nucleus	transcription regulator
ARMCX1	armadillo repeat containing X-linked 1	ARMCX1	1.049	0.0427	Other	other
ZNF583	zinc finger protein 583	ZNF583	1.045	0.00858	Nucleus	transcription regulator
FKBP11	FKBP prolyl isomerase 11	FKBP11	1.043	0.036	Cytoplasm	enzyme
DNAJC18	DnaJ heat shock protein family (Hsp40) member C18	DNAJC18	1.041	0.0223	Cytoplasm	enzyme
CLCN2	chloride voltage-gated channel 2	CLCN2	1.032	0.0134	Plasma Membrane	ion channel		lubiprostone
LPAR1	lysophosphatidic acid receptor 1	LPAR1	1.03	0.0299	Plasma Membrane	G-protein coupled receptor
MYH10	myosin heavy chain 10	MYH10	1.023	0.044	Cytoplasm	enzyme	unspecified application
LZTS3	leucine zipper tumor suppressor family member 3	LZTS3	1.021	1.11e-05	Cytoplasm	other
EBF3	EBF transcription factor 3	EBF3	1.014	0.0389	Nucleus	transcription regulator
CCDC88A	coiled-coil domain containing 88A	CCDC88A	1.011	0.0443	Cytoplasm	other
MOCS1	molybdenum cofactor synthesis 1	MOCS1	1.007	0.00969	Cytoplasm	other
KLK5	kallikrein related peptidase 5	KLK5	1.005	0.00153	Extracellular Space	peptidase	diagnosis,prognosis	MDPK67b
ZFP69B	ZFP69 zinc finger protein B	ZFP69B	1.003	0.0215	Nucleus	transcription regulator
ZAN	zonadhesin	ZAN	-1.002	0.00707	Plasma Membrane	other
AGPAT2	1-acylglycerol-3-phosphate O-acyltransferase 2	AGPAT2	-1.003	0.00501	Cytoplasm	enzyme	prognosis
CNN2	calponin 2	CNN2	-1.008	0.0442	Cytoplasm	other
LIMS2	LIM zinc finger domain containing 2	LIMS2	-1.01	1.55e-05	Cytoplasm	other
DLG2	discs large MAGUK scaffold protein 2	DLG2	-1.01	0.0333	Plasma Membrane	kinase
MST1R	macrophage stimulating 1 receptor	MST1R	-1.015	0.000236	Plasma Membrane	kinase		crizotinib,crizotinib/gefitinib,crizotinib/vemurafenib,glesatinib,narnatumab
MYH14	myosin heavy chain 14	MYH14	-1.02	0.00392	Extracellular Space	enzyme		mavacamten
GJA1	gap junction protein alpha 1	GJA1	-1.021	0.0156	Plasma Membrane	transporter		ALMB-0168
CAMK2A	calcium/calmodulin dependent protein kinase II alpha	CAMK2A	-1.022	0.0274	Cytoplasm	kinase
ENTPD2	ectonucleoside triphosphate diphosphohydrolase 2	ENTPD2	-1.025	0.00465	Cytoplasm	enzyme
HSF4	heat shock transcription factor 4	HSF4	-1.037	1.25e-06	Nucleus	transcription regulator
AMN	amnion associated transmembrane protein	AMN	-1.045	0.0241	Plasma Membrane	other
LYPD3	LY6/PLAUR domain containing 3	LYPD3	-1.046	0.0277	Plasma Membrane	other		lupartumab amadotin
HES2	hes family bHLH transcription factor 2	HES2	-1.047	0.00455	Nucleus	transcription regulator
ENDOU	endonuclease, poly(U) specific	ENDOU	-1.061	0.0282	Cytoplasm	peptidase
CKB	creatine kinase B	CKB	-1.062	1.12e-05	Cytoplasm	kinase	safety
TMEM171	transmembrane protein 171	TMEM171	-1.064	0.0163	Other	other
TTLL10	tubulin tyrosine ligase like 10	TTLL10	-1.067	0.0205	Cytoplasm	enzyme
FA2H	fatty acid 2-hydroxylase	FA2H	-1.071	0.00184	Cytoplasm	enzyme
SCEL	sciellin	SCEL	-1.073	0.0129	Cytoplasm	other
EVPL	envoplakin	EVPL	-1.074	0.0102	Plasma Membrane	other
CA13	carbonic anhydrase 13	CA13	-1.08	0.00333	Cytoplasm	enzyme		acetazolamide,benzthiazide,chlorothiazide,chlorthalidone,hydrochlorothiazide,methazolamide,sulfacetamide,topiramate,trichloromethiazide
SLITRK6	SLIT and NTRK like family member 6	SLITRK6	-1.09	0.0119	Plasma Membrane	other		sirtratumab vedotin
FAM162A	family with sequence similarity 162 member A	FAM162A	-1.093	0.00102	Cytoplasm	other
ZC3H12A	zinc finger CCCH-type containing 12A	ZC3H12A	-1.113	0.0418	Cytoplasm	enzyme
ARHGEF19	Rho guanine nucleotide exchange factor 19	ARHGEF19	-1.123	0.017	Cytoplasm	other
IKZF2	IKAROS family zinc finger 2	IKZF2	-1.129	0.0221	Nucleus	transcription regulator		DKY709
CLIP4	CAP-Gly domain containing linker protein family member 4	CLIP4	-1.134	0.00245	Other	other
BCL3	BCL3 transcription coactivator	BCL3	-1.139	0.033	Nucleus	transcription regulator
LRATD1	LRAT domain containing 1	LRATD1	-1.14	0.00913	Other	other
CEACAM16	CEA cell adhesion molecule 16, tectorial membrane component	CEACAM16	-1.141	0.0115	Cytoplasm	other
NAALAD2	N-acetylated alpha-linked acidic dipeptidase 2	NAALAD2	-1.143	0.0163	Plasma Membrane	peptidase
MOCOS	molybdenum cofactor sulfurase	MOCOS	-1.145	0.00461	Cytoplasm	enzyme
WNT4	Wnt family member 4	WNT4	-1.148	0.00468	Extracellular Space	cytokine
CKM	creatine kinase, M-type	CKM	-1.149	0.035	Cytoplasm	kinase	efficacy,safety,unspecified application
TMEM121	transmembrane protein 121	TMEM121	-1.16	0.0105	Other	other
TMEM63C	transmembrane protein 63C	TMEM63C	-1.164	0.0122	Plasma Membrane	ion channel
SLC6A2	solute carrier family 6 member 2	SLC6A2	-1.17	0.00484	Plasma Membrane	transporter		(S)-duloxetine,3-iodobenzylguanidine,acetaminophen/clemastine/pseudoephedrine,acetaminophen/dexbrompheniramine/pseudoephedrine,acetaminophen/tramadol,amitriptyline,amitriptyline/baclofen/ketamine,amitriptyline/chlordiazepoxide,amitriptyline/ketamine,amitriptyline/melatonin,amitriptyline/perphenazine,amoxapine,amphetamine,aspirin/caffeine/orphenadrine,atomoxetine,azatadine/pseudoephedrine,benzphet…
SLC10A6	solute carrier family 10 member 6	SLC10A6	-1.172	3.57e-05	Plasma Membrane	transporter
SULT2B1	sulfotransferase family 2B member 1	SULT2B1	-1.172	0.00136	Cytoplasm	enzyme
OASL	2'-5'-oligoadenylate synthetase like	OASL	-1.182	0.0458	Cytoplasm	enzyme	unspecified application
MMP11	matrix metallopeptidase 11	MMP11	-1.182	0.0084	Extracellular Space	peptidase	diagnosis,disease progression,unspecified application	marimastat
LRP4	LDL receptor related protein 4	LRP4	-1.185	0.0128	Extracellular Space	other
TRPV3	transient receptor potential cation channel subfamily V member 3	TRPV3	-1.187	0.00968	Plasma Membrane	ion channel		cannabigerol
PLEKHG6	pleckstrin homology and RhoGEF domain containing G6	PLEKHG6	-1.19	0.0261	Cytoplasm	other
PLD1	phospholipase D1	PLD1	-1.193	0.00248	Cytoplasm	enzyme
MMP28	matrix metallopeptidase 28	MMP28	-1.202	0.00171	Extracellular Space	peptidase		marimastat
FAM3D	FAM3 metabolism regulating signaling molecule D	FAM3D	-1.21	0.00186	Extracellular Space	cytokine
CCNP	cyclin P	CNTD2	-1.211	0.00568	Nucleus	other
SDCBP2	syndecan binding protein 2	SDCBP2	-1.211	0.00253	Cytoplasm	other
CCDC12	coiled-coil domain containing 12	CCDC12	-1.211	0.00413	Nucleus	other
LORICRIN	loricrin cornified envelope precursor protein	LOR	-1.22	0.0149	Cytoplasm	other	unspecified application
FRMPD3	FERM and PDZ domain containing 3	FRMPD3	-1.234	0.00567	Cytoplasm	other
CITED4	Cbp/p300 interacting transactivator with Glu/Asp rich carboxy-terminal domain 4	CITED4	-1.247	0.0234	Nucleus	transcription regulator
CXCR2	C-X-C motif chemokine receptor 2	CXCR2	-1.261	0.00422	Plasma Membrane	G-protein coupled receptor		2'-((4'-trifluoromethanesulfonyloxy)phenyl)-N-methanesulfonylpropionamide,AZD5069,MGTA-145,navarixin,QBM076,repertaxin,SB-265610,SX-682,vimnerixin
SLC4A4	solute carrier family 4 member 4	SLC4A4	-1.266	0.00473	Plasma Membrane	transporter
MAOB	monoamine oxidase B	MAOB	-1.286	0.00184	Cytoplasm	enzyme		benzphetamine,dextroamphetamine,fenfluramine/phentermine,isocarboxazid,ladostigil,levodopa/rasagiline,MAO-B inhibitor,methamphetamine,pargyline,phenelzine,phentermine,phentermine/topiramate,procainamide,rasagiline,safinamide,selegiline,tranylcypromine
NT5C2	5'-nucleotidase, cytosolic II	NT5C2	-1.287	0.0205	Cytoplasm	phosphatase
SOD1	superoxide dismutase 1	SOD1	-1.316	0.0135	Cytoplasm	enzyme	unspecified application	tofersen
EDIL3	EGF like repeats and discoidin domains 3	EDIL3	-1.328	0.00134	Extracellular Space	other
CARNS1	carnosine synthase 1	CARNS1	-1.358	0.0138	Cytoplasm	enzyme
PLBD1	phospholipase B domain containing 1	PLBD1	-1.366	0.0269	Cytoplasm	enzyme
ABRACL	ABRA C-terminal like	ABRACL	-1.368	0.0139	Other	other
APBA2	amyloid beta precursor protein binding family A member 2	APBA2	-1.394	0.00322	Cytoplasm	transporter	disease progression
SLC49A3	solute carrier family 49 member 3	SLC49A3	-1.397	0.0113	Other	other
SCNN1D	sodium channel epithelial 1 subunit delta	SCNN1D	-1.403	0.00947	Plasma Membrane	ion channel		amiloride,amiloride/hydrochlorothiazide,hydrochlorothiazide/triamterene,triamterene
PLA2G5	phospholipase A2 group V	PLA2G5	-1.412	0.00324	Extracellular Space	enzyme		varespladib,varespladib methyl
AMPD1	adenosine monophosphate deaminase 1	AMPD1	-1.44	0.0101	Cytoplasm	enzyme
CLDN23	claudin 23	CLDN23	-1.443	0.0355	Plasma Membrane	other
MPIG6B	megakaryocyte and platelet inhibitory receptor G6b	MPIG6B	-1.453	0.0084	Plasma Membrane	other
CCDC88B	coiled-coil domain containing 88B	CCDC88B	-1.464	0.0218	Nucleus	enzyme
TNNT2	troponin T2, cardiac type	TNNT2	-1.466	0.00021	Cytoplasm	other	diagnosis,efficacy,prognosis,safety,unspecified application
CNFN	cornifelin	CNFN	-1.511	0.00783	Cytoplasm	other
SYT2	synaptotagmin 2	SYT2	-1.528	0.0122	Cytoplasm	transporter
MYOM2	myomesin 2	MYOM2	-1.538	0.00103	Cytoplasm	other	unspecified application
ID1	inhibitor of DNA binding 1	ID1	-1.558	2.85e-05	Nucleus	transcription regulator	disease progression
SLC6A15	solute carrier family 6 member 15	SLC6A15	-1.574	4.08e-06	Plasma Membrane	transporter
SPTSSB	serine palmitoyltransferase small subunit B	SPTSSB	-1.577	0.00594	Cytoplasm	enzyme
LIPM	lipase family member M	LIPM	-1.586	0.00155	Extracellular Space	enzyme
SMAGP	small cell adhesion glycoprotein	SMAGP	-1.629	0.00324	Cytoplasm	other
STX19	syntaxin 19	STX19	-1.647	0.00694	Other	other
CDH17	cadherin 17	CDH17	-1.649	3.63e-06	Plasma Membrane	transporter		BI 905711
ARHGAP45	Rho GTPase activating protein 45	ARHGAP45	-1.704	0.00045	Cytoplasm	transporter
DEFB1	defensin beta 1	DEFB1	-1.771	0.00302	Extracellular Space	other	diagnosis,unspecified application
PKD2L1	polycystin 2 like 1, transient receptor potential cation channel	PKD2L1	-1.778	0.00484	Plasma Membrane	ion channel
MUC21	mucin 21, cell surface associated	MUC21	-1.799	0.00783	Cytoplasm	other
PTGS2	prostaglandin-endoperoxide synthase 2	PTGS2	-1.817	0.00345	Cytoplasm	enzyme	diagnosis,disease progression,efficacy,prognosis,unspecified application	acetaminophen,acetaminophen/aspirin/caffeine,acetaminophen/aspirin/codeine,acetaminophen/butalbital,acetaminophen/butalbital/caffeine,acetaminophen/butalbital/caffeine/codeine,acetaminophen/caffeine/chlorpheniramine/hydrocodone/phenylephrine,acetaminophen/caffeine/dihydrocodeine,acetaminophen/cetirizine/prednisolone,acetaminophen/clemastine/pseudoephedrine,acetaminophen/codeine,acetaminophen/dexb…
PDK4	pyruvate dehydrogenase kinase 4	PDK4	-1.893	0.00428	Cytoplasm	kinase
SLC15A2	solute carrier family 15 member 2	SLC15A2	-1.894	0.00423	Plasma Membrane	transporter	unspecified application
SH2D5	SH2 domain containing 5	SH2D5	-1.903	0.00291	Plasma Membrane	other
ADAMTSL5	ADAMTS like 5	ADAMTSL5	-1.952	1.25e-06	Extracellular Space	other
HS3ST1	heparan sulfate-glucosamine 3-sulfotransferase 1	HS3ST1	-1.955	0.00219	Cytoplasm	enzyme
AIFM3	apoptosis inducing factor mitochondria associated 3	AIFM3	-1.984	0.00663	Cytoplasm	enzyme
NRXN2	neurexin 2	NRXN2	-2.071	4.97e-05	Plasma Membrane	transmembrane receptor
CACNA1E	calcium voltage-gated channel subunit alpha1 E	CACNA1E	-2.077	0.000407	Plasma Membrane	ion channel
ABCA7	ATP binding cassette subfamily A member 7	ABCA7	-2.121	9.83e-05	Plasma Membrane	transporter
FAM25A (includes others)	family with sequence similarity 25 member A	FAM25A	-2.122	0.00325	Other	other
ENTREP2	endosomal transmembrane epsin interactor 2	FAM189A1	-2.212	0.000457	Other	other
GJD4	gap junction protein delta 4	GJD4	-2.24	0.0188	Plasma Membrane	transporter
NKAIN3	sodium/potassium transporting ATPase interacting 3	NKAIN3	-2.385	0.00395	Other	other
GALNT14	polypeptide N-acetylgalactosaminyltransferase 14	GALNT14	-2.393	0.00102	Cytoplasm	enzyme
PPP2R2B	protein phosphatase 2 regulatory subunit Bbeta	PPP2R2B	-2.498	0.000202	Cytoplasm	phosphatase
ARR3	arrestin 3	ARR3	-2.502	0.000487	Cytoplasm	other
EOMES	eomesodermin	EOMES	-2.553	0.0127	Nucleus	transcription regulator
GRIP1	glutamate receptor interacting protein 1	GRIP1	-2.659	0.000696	Plasma Membrane	transcription regulator
EPS8L3	EPS8 like 3	EPS8L3	-3.083	0.000436	Extracellular Space	other
PNMT	phenylethanolamine N-methyltransferase	PNMT	-3.28	0.00324	Cytoplasm	enzyme
CA2	carbonic anhydrase 2	CA2	-3.412	0.000183	Cytoplasm	enzyme	diagnosis,unspecified application	acetazolamide,benzthiazide,brimonidine/brinzolamide,brinzolamide,chlorothiazide,chlorothiazide/reserpine,chlorthalidone,diazoxide,dichlorphenamide,dorzolamide,dorzolamide/timolol,ethoxyzolamide,hydrochlorothiazide,methazolamide,phentermine/topiramate,quinethazone,sulfacetamide,topiramate,trichloromethiazide
MUC3A	mucin 3A, cell surface associated	MUC3A	-3.466	0.00449	Other	other
CA3	carbonic anhydrase 3	CA3	-4.006	1.43e-07	Cytoplasm	enzyme		acetazolamide,benzthiazide,chlorothiazide,chlorthalidone,hydrochlorothiazide,methazolamide,sulfacetamide,topiramate,trichloromethiazide
